# Supplementary material for: Efficient Exfoliation of Layered Double Hydroxides; Effect of Cationic Ratio, Hydration State, Anions and Their Orientations
Source: PubMed Central journal article supplement (PMC7826757; doi:10.3390/ma14020346), 2021-01-12
Supplement: materials-14-00346-s001.pdf [file materials-14-00346-s001.pdf]

## Supplementary information

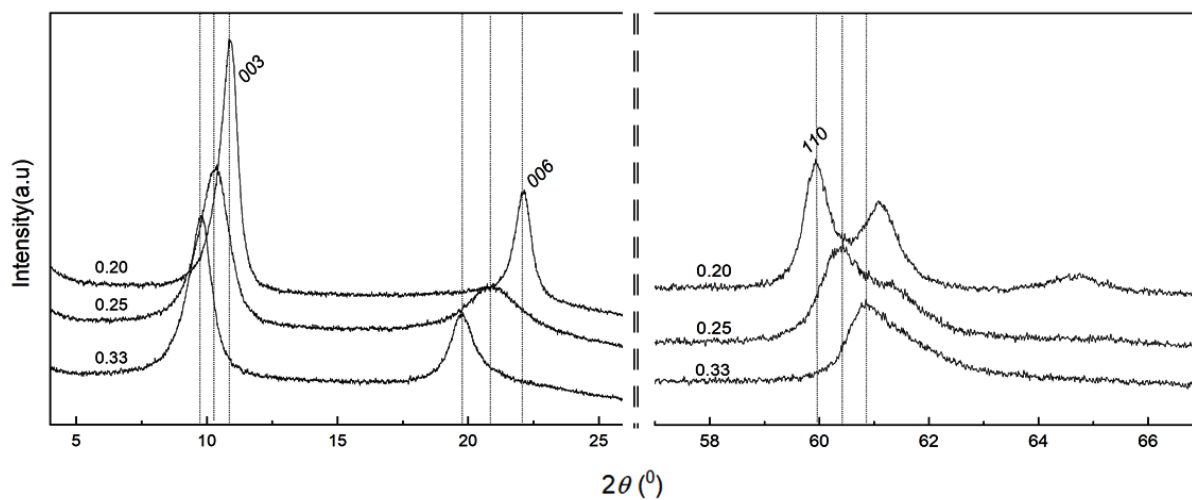

**Figure S1.** X-ray diffraction profiles of (003), (006) and (110) Bragg-reflections for as-synthesized, freeze dried  $\text{Mg}_{1-x}\text{Al}_x(\text{OH})_2(\text{NO}_3)_x \cdot m\text{H}_2\text{O}$  ( $x = 0.20, 0.25$  and  $0.33$ ;  $\lambda = 1.540596 \text{ \AA}$ ).

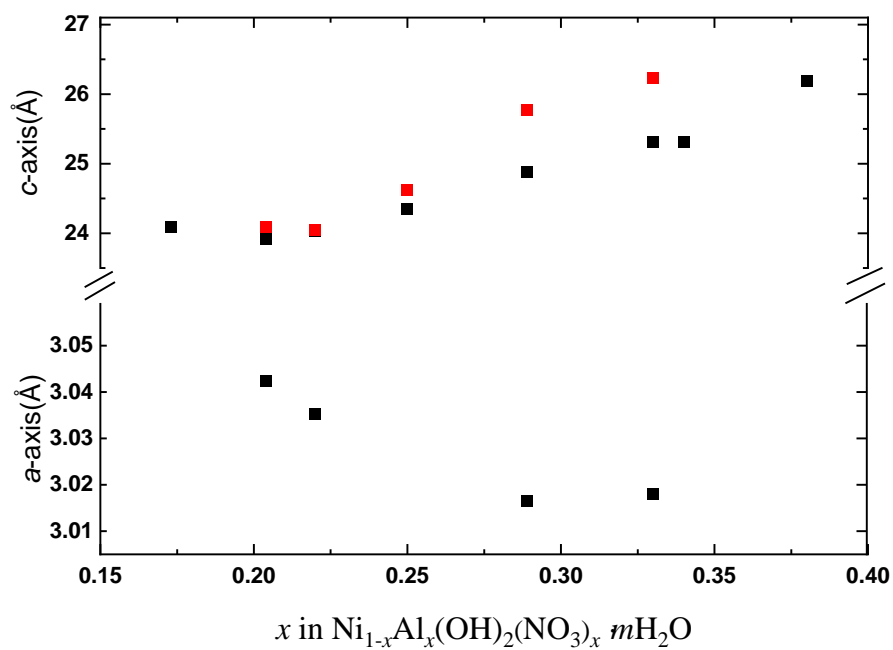

**Figure S2.** Unit cell dimensions versus nominal composition  $x$  for  $\text{Ni}_{1-x}\text{Al}_x(\text{OH})_2(\text{NO}_3)_x \cdot m\text{H}_2\text{O}$  prepared at pH = 9.0 (■) and pH = 10.0 (■).

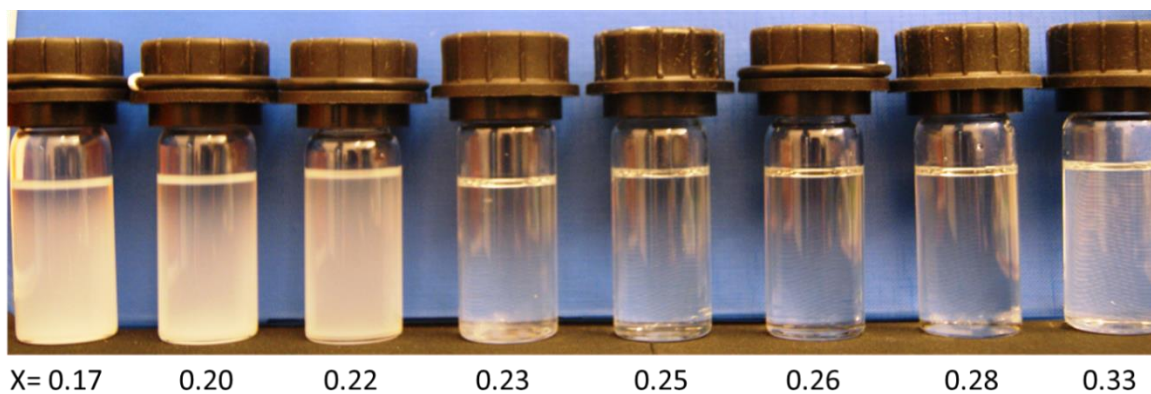

**Figure S3.** Cuvettes with suspensions of exfoliated  $\text{Mg}_{1-x}\text{Al}_x(\text{OH})_2(\text{NO}_3)_x \cdot m\text{H}_2\text{O}$  after 4 hours of sonication.

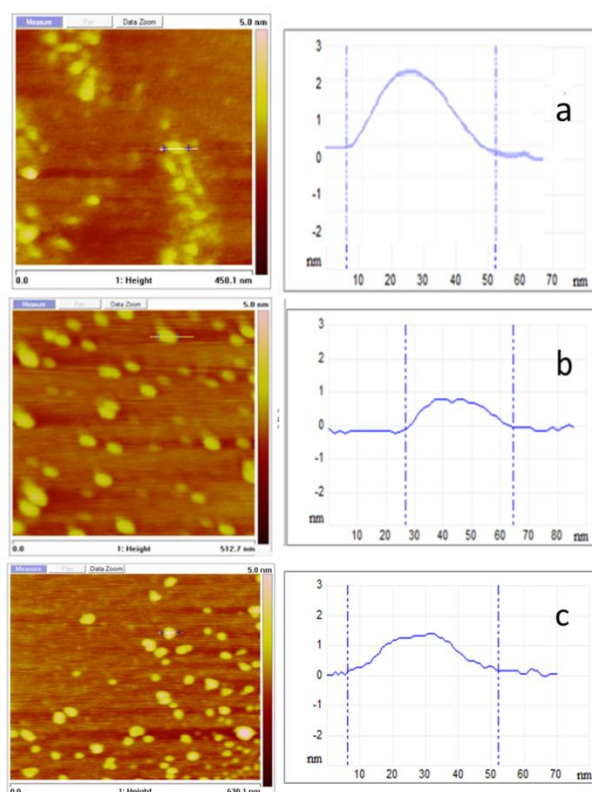

**Figure S4.** Tapping mode AFM images of  $\text{Mg}_{1-x}\text{Al}_x(\text{OH})_2(\text{NO}_3)_x \cdot m\text{H}_2\text{O}$ , **a)**  $x = 0.20$ , **b)**  $x = 0.25$ , **c)**  $x = 0.33$  and its section profile analysis.
